# Supplementary material for: Structure-based cross-docking analysis of antibody–antigen interactions
Source: PubMed Central journal article supplement (PMC5557897; doi:10.1038/s41598-017-08414-y), 2017-08-15
Supplement: 41598_2017_8414_MOESM1_ESM.pdf [file 41598_2017_8414_MOESM1_ESM.pdf]

## Supplementary information

### Structure-based cross-docking analysis of antibody–antigen interactions

Krishna Praneeth Kilambi<sup>1,†</sup>, Jeffrey J. Gray<sup>1,\*</sup>

1. Department of Chemical and Biomolecular Engineering, The Johns Hopkins University,  
Baltimore, MD 21218, USA

† Current address: Biogen, Cambridge, MA 02142, USA

\* Correspondence: [jgray@jhu.edu](mailto:jgray@jhu.edu)

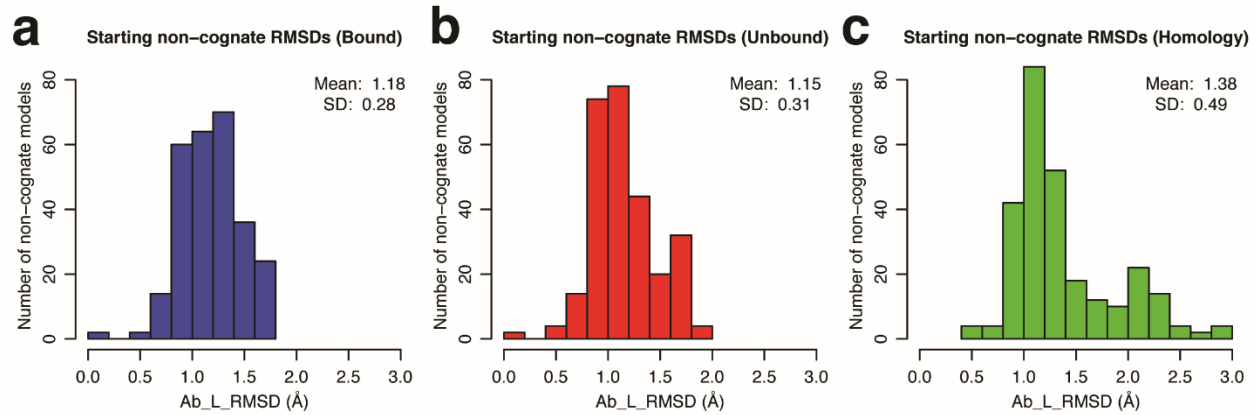

**Figure S1: Starting non-cognate antibody deviations.** Starting antibody ligand-RMSD distributions of the non-cognate antibodies superimposed on the corresponding cognate antibody in (a) bound, (b) unbound, and (c) homology complexes. Antibody ligand-RMSDs for the antibodies are calculated over the  $C_{\alpha}$  atoms of their framework residues after aligning the antigen backbones and are analogous to the ligand RMSDs using in docking calculations. The average RMSDs range from 1.2–1.4 Å from the starting cognate orientation.

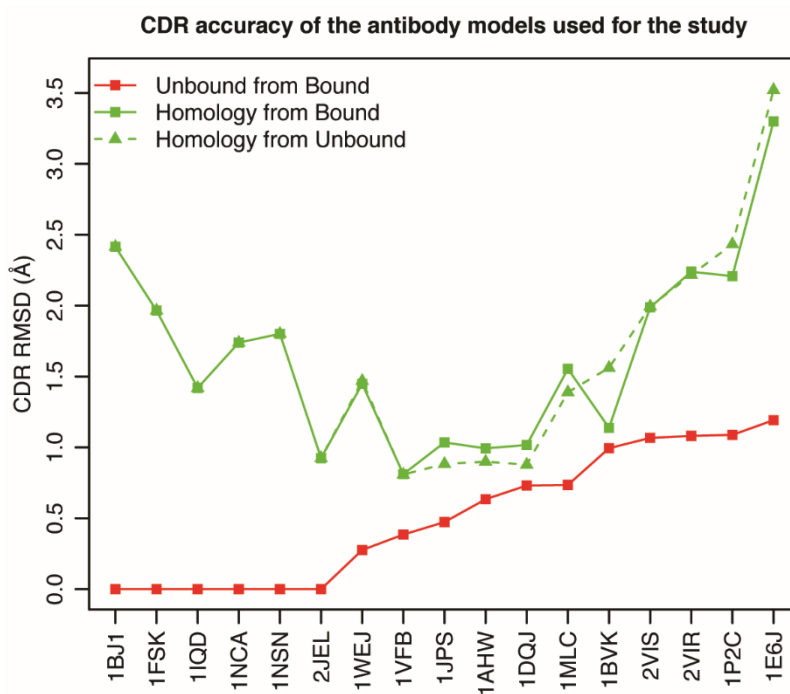

**Figure S2: Accuracy of the antibody homology models used for the study.** CDR backbone RMSDs of the antibody homology models from their bound (green squares; solid line) and unbound (green triangles; dotted line) backbones. Most of the antibody homology models are closer to their unbound backbones (6/17) than bound backbones (5/17), with the remaining lacking unbound coordinates for comparison. CDR RMSDs of the unbound antibodies compared to their bound backbones (red squares; normal line) are also shown for comparison.

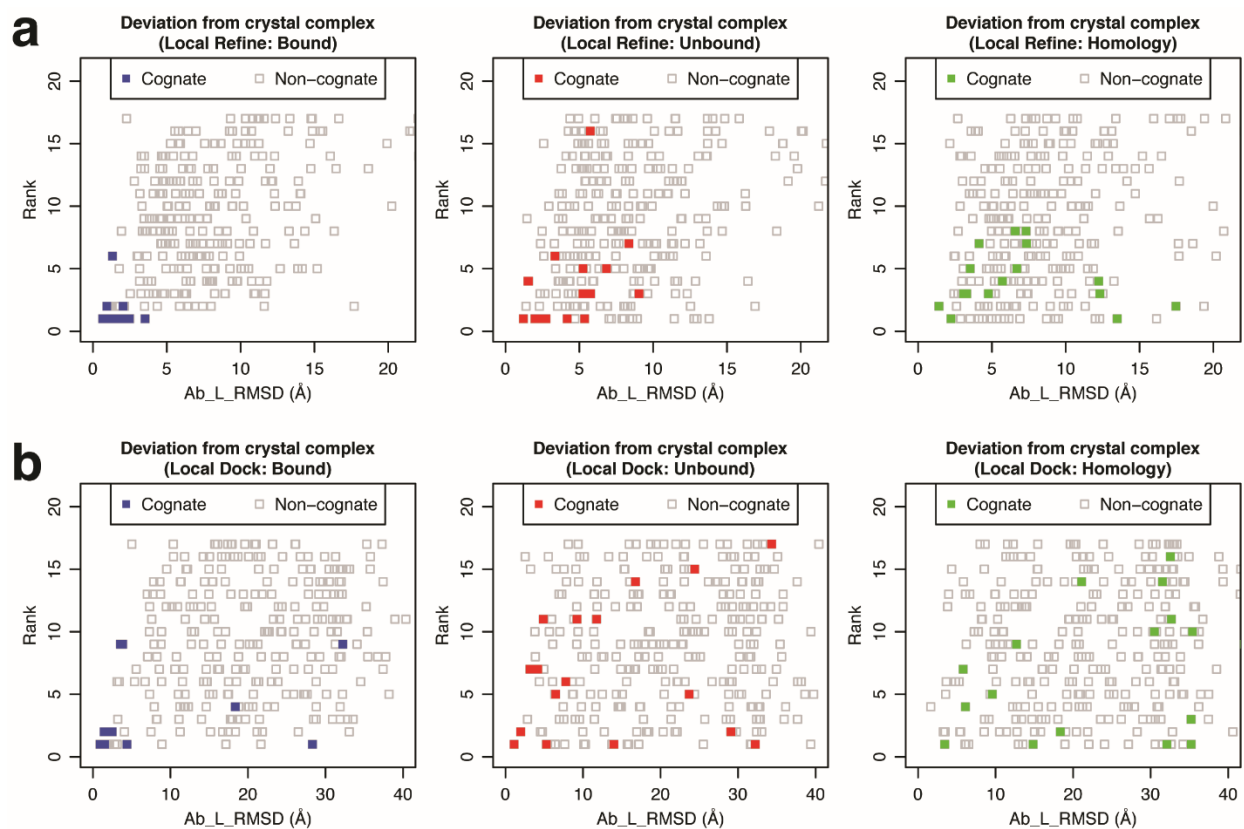

**Figure S3: Effects of deviation from the crystal complex orientation on antibody rank.** Correlation plots comparing ranks of the top-scoring cognate and non-cognate models and their antibody ligand-RMSDs from the original crystal complex for models generated using (a) local refine, and (b) local dock for bound (blue), unbound (red), and homology (green) complexes. Antibody ligand-RMSDs for the antibodies are calculated over the  $C_{\alpha}$  atoms of their framework residues after aligning the antigen backbones and are analogous to the ligand RMSDs using in docking calculations. Cognate and non-cognate models (grey) are shown as filled and empty squares, respectively.

**Supplemental Dataset 1: Homology models of the 17 antibodies in the test set.**
